Impact of a demanding movement on decision-making

1           **Humans sacrifice decision-making for action**  
2                   **execution when a demanding control of**  
3                           **movement is required**

6           Amélie J. REYNAUD, Clara SALERI LUNAZZI, David THURA

7                   *Lyon Neuroscience Research Center – Impact team*  
8                   *Inserm U1028 – CNRS UMR5225 – Lyon University*

11                           *Running head*

12                           Impact of a demanding movement on decision-making

14                           *Corresponding author information*

15                           David Thura

16                           Lyon Neuroscience Research Center – Impact team  
17                           Inserm U1028 – CNRS UMR5225 – Lyon University  
18                           16 avenue du Doyen Lépine, 69675 Bron, France  
19                           Phone : +33 4 72 91 34 14  
20                           E-mail: david.thura@inserm.fr

23                           *Manuscript information*

24                           Total word count: ~10150; 30 pages; 8 figures

26                           *Conflict of interest*

27                           The authors declare no competing financial interests

29                           *Funding*

30                           This work was supported by a CNRS/Inserm ATIP/Avenir grant and an Inserm young  
31                           investigator fellowship to DT

## Impact of a demanding movement on decision-making

32

### ABSTRACT

33 A growing body of evidence suggests that decision-making and action execution are governed by  
34 partly overlapping operating principles. Especially, previous work proposed that a shared decision  
35 urgency/movement vigor signal, possibly computed in the basal ganglia, coordinates both  
36 deliberation and movement durations in a way that maximizes reward rate. Recent data support  
37 one aspect of this hypothesis, indicating that the urgency level at which a decision is made  
38 influences the vigor of the movement produced to express this choice. Here we investigated  
39 whether conversely, the motor context in which a movement is executed determines decision speed  
40 and accuracy. Twenty human subjects performed a probabilistic decision task in which perceptual  
41 choices were expressed by reaching movements toward targets whose size and distance from a  
42 starting position varied in distinct blocks of trials. We found strong evidence for an influence of  
43 the motor context on most of subjects' decision policy but contrary to the predictions of the "shared  
44 regulation" hypothesis, we observed that slow movements executed in the most demanding motor  
45 blocks in terms of accuracy were often preceded by faster and less accurate decisions compared to  
46 blocks of trials in which big targets allowed expression of choices with fast and inaccurate  
47 movements. These results suggest that decision-making and motor control are not regulated by  
48 one unique "invigoration" signal determining both decision urgency and action vigor, but more  
49 likely by independent, yet interacting, decision urgency and movement vigor signals.

50

51

52

### KEYWORDS

53

Decision-making, Reaching, Urgency, Speed-accuracy trade-off, Human

## Impact of a demanding movement on decision-making

54

### INTRODUCTION

55 Animals, including humans, are faced with decisions about actions on a daily basis, and they  
56 behave in order to seek rewards while avoiding punishments and minimizing energy expenditure.  
57 Because evaluation of reward, risk and effort governs our action choices, investigating how the  
58 brain process these variables is critical to improve our understanding of adapted or dysfunctional  
59 goal-directed behavior.

60 Importantly, the subjective value of a given activity is not only limited to its related reward, risks  
61 and efforts. It also depends on the amount of time invested in it, as time strongly discounts the  
62 value of rewards (Myerson and Green, 1995). Therefore, what is ultimately most adaptive is to  
63 choose options that maximize one's global reward rate (Bogacz et al., 2010; Balci et al., 2011),  
64 which occurs when the decision and action processes are sufficiently accurate but not overly  
65 effortful and time consuming. As a consequence, nearly all decision scenarios present decision-  
66 makers with speed-accuracy-effort trade-offs during both decision-making and action execution,  
67 and the brain must control both processes to maximize the rate of reward.

68 Because trade-offs during decision and action have been typically studied in isolation, mechanisms  
69 allowing a coordinated maximization of reward rate are still elusive. Recent promising advances  
70 suggest, however, that motor control and choices, including economic ones, are governed by partly  
71 overlapping optimization principles (Shadmehr et al., 2010, 2019; Haith et al., 2012; Choi et al.,  
72 2014; Yoon et al., 2018; Carland et al., 2019). First, human and non-human primates move faster  
73 and with a shorter reaction time toward items that they value more (Kawagoe et al., 1998;  
74 Summerside et al., 2018; Revol et al., 2019). Second, humans take motor costs into account during  
75 both motor (Cos et al., 2011, 2012, 2014; Morel et al., 2017) and perceptual (Burk et al., 2014;  
76 Marcos et al., 2015; Hagura et al., 2017) decisions and effortful reaches impose a cost for decision-  
77 making similar to cost functions in motor control (Wickler et al., 2000; Shadmehr et al., 2016;  
78 Morel et al., 2017; Reppert et al., 2018). Finally, in the foraging paradigm where animals make  
79 decisions regarding how long to stay and accumulate reward from one patch, and then move with  
80 certain speed to another patch, the goods collection duration and the vigor (movement speed and  
81 duration) with which human subjects move from one reward site to another are governed by a  
82 mechanism allowing to maximize the overall capture rate (Yoon et al., 2018).

## Impact of a demanding movement on decision-making

83 In line with this shared optimization hypothesis, we and others have proposed that control of  
84 urgency is critical for reward rate maximization during decision-making between actions  
85 (Ditterich, 2006; Churchland et al., 2008; Standage et al., 2011; Thura et al., 2012; Malhotra et al.,  
86 2017, 2018). Urgency is a context-dependent, motor-related signal that grows over the time course  
87 of a deliberation, pushing the decision-related neural activity toward the commitment threshold  
88 (Thura and Cisek, 2014; Kira et al., 2015; Murphy et al., 2016; Steinemann et al., 2018).  
89 Remarkably, we demonstrated in a changing evidence decision task that urgency level at decision  
90 time strongly influences speed and duration of the following motor commands: early decisions,  
91 usually made on the basis of strong sensory evidence but low urgency, were followed by long  
92 movements (in terms of duration) whereas late decisions, relying on weak sensory evidence but  
93 strong urgency, were followed by faster movements. Then, when subjects were encouraged to make  
94 faster and less accurate decisions in distinct blocks of trials, movements were faster compared to  
95 blocks encouraging slow and accurate choices. These results imply that a shared invigoration  
96 signal, possibly computed in the basal ganglia, coordinates the unified adaptation of the speed-  
97 accuracy trade-off during both decision-making and action execution in order to control the rate of  
98 reward (Thura et al., 2014; Thura and Cisek, 2016, 2017; Cisek and Thura, 2018; Thura, 2020).

99 We proposed a model of this hypothetical mechanism, labelled the “shared regulation” hypothesis  
100 (Figure 1A, Thura et al., 2014). In this model, speed-accuracy trade-offs for deciding and acting  
101 are influenced by a shared decision urgency/movement vigor signal. As a consequence, the context-  
102 dependent urgency level at which a decision is made should determine the vigor (duration and  
103 speed scaled by amplitude) of movements produced to express this choice and conversely, the  
104 context-dependent vigor of movements executed to express a choice should predict the level of  
105 urgency with which that choice is made. Recent behavioral and neurophysiological data collected  
106 in both trained monkeys and naïve humans strongly support the former prediction (Thura et al.,  
107 2014; Thura and Cisek, 2016; Thura, 2020). The latter prediction, namely whether or not the fastest  
108 choices are made in motor contexts encouraging the most vigorous movements (Figure 1B),  
109 remains, however, to be tested.

110 To this aim, we conducted an experiment in which human subjects performed a probabilistic  
111 decision task in which perceptual choices were expressed by reaching movements toward targets  
112 whose size and distance from the starting point varied across blocks of trials, allowing us to assess  
113 the effects of the motor context on subjects’ decision policy.

## Impact of a demanding movement on decision-making

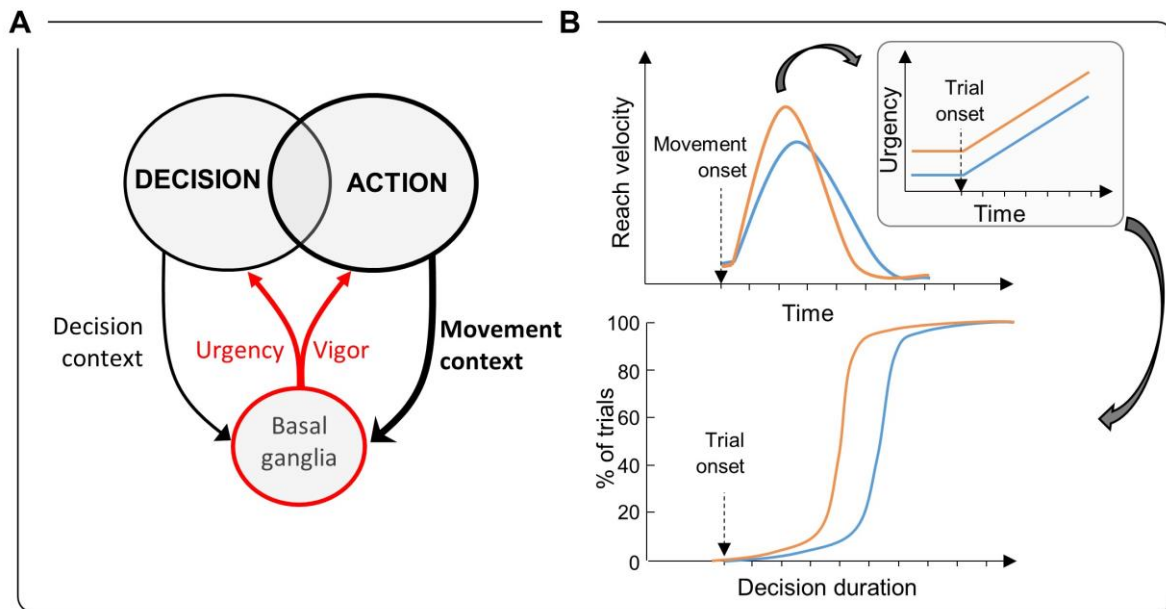

114

115 **Figure 1: The “shared regulation” hypothesis.** A. Simplified hypothetical mechanism of a  
116 shared regulation of decision and movement durations by one unique invigoration (decision  
117 urgency/movement vigor) signal, possibly computed in the basal ganglia (Thura et al., 2014;  
118 Thura and Cisek, 2017). The thick black lines illustrate the manipulation of the motor context,  
119 tested in the present study, leading to the modulation of the urgency/vigor signal. B. The  
120 shared regulation hypothesis makes a simple prediction regarding the effect of the motor  
121 context in which a decision is made on the duration of that decision: if a context encourages  
122 execution of vigorous (faster, shorter) movements (orange) to report choices, then the urgency  
123 level in this context should be raised compared to another context in which movements need  
124 to be less vigorous but more accurate (blue). As a consequence, equally difficult decisions  
125 made in the vigorous block of trials should be on average shorter than those made in the block  
126 encouraging slow and accurate movements.

127

## 128 MATERIALS AND METHODS

### 129 *Participants*

130 Twenty-three healthy, human subjects (ages: 18-41; 17 females; 21 right handed) participated in  
131 this study. All gave their consent orally before starting the experiment. The ethics committee of  
132 Inserm (IRB00003888) approved the protocol on March 19<sup>th</sup> 2019. Each participant was asked to  
133 perform two experimental sessions. They received a monetary compensation (20 € per completed  
134 session) for participating in this study. Among them, twenty (ages: 20-41; 16 females; 18 right  
135 handed) completed at least two sessions and have thus been included in the present dataset.

## Impact of a demanding movement on decision-making

### 136 *Dataset*

137 The decision and motor behaviors of most of subjects (17/20) have been described in a recent  
138 publication whose aim was to report the effect of decision strategy on movement properties in  
139 human subjects (Thura, 2020). This analysis showed that according to the shared regulation  
140 hypothesis, the urgency level at time of decision commitment strongly influences movement  
141 kinematics, with urgency-based decisions leading to vigorous movements. In the present paper,  
142 we analyzed data of the same subjects along with data from 3 additional ones, but we grouped trials  
143 depending on movement constraints (target size/movement amplitude configurations, see below),  
144 allowing us to test on the same subjects the reverse side of the shared regulation hypothesis, i.e.  
145 the effects of motor context on decision policy.

### 146 *Setup*

147 The subjects sat in an armchair made planar reaching movements using a lever held in their  
148 dominant hand. A digitizing tablet (GTCO CalComp) continuously recorded the lever horizontal  
149 and vertical positions (100 Hz with 0.013cm accuracy). Target stimuli and cursor feedback were  
150 projected by a DELL P2219H LCD monitor (60 Hz refresh rate) onto a half-silvered mirror  
151 suspended 26 cm above and parallel to the digitizer plane, creating the illusion that targets floated  
152 on the plane of the tablet. Unconstrained eye movements and pupil area of a subset of subjects were  
153 recorded using an infrared camera (ISCAN, sampling rate of 120 Hz, data not shown).

### 154 *Tasks*

155 The subjects performed a modified version of the tokens task (Figure 2A, see Cisek et al., 2009 for  
156 the original version). They were faced with a visual display consisting of three blue circles (1.5 cm  
157 radius) placed horizontally at a distance of 6 cm of each other (the “decision” stimuli). In the central  
158 blue circle 15 small tokens were randomly arranged. Positioned 12 cm below, three black circles,  
159 organized horizontally as well defined the “movement” stimuli. While the central black circle  
160 radius was kept constant at 0.75 cm, the size of the two lateral black circles and their distance from  
161 the central circle could vary, set to either 0.75 (small) or 1.5 cm (big) of radius, and to either 6  
162 (short) or 12 cm (long) of distance from the central circle, in distinct blocks of trials. This design  
163 allowed us to define four motor blocks depending on the size/distance combination of the two  
164 targets: “small/short”, “small/long”, “big/short” and “big/long” (Figure 2B).

## Impact of a demanding movement on decision-making

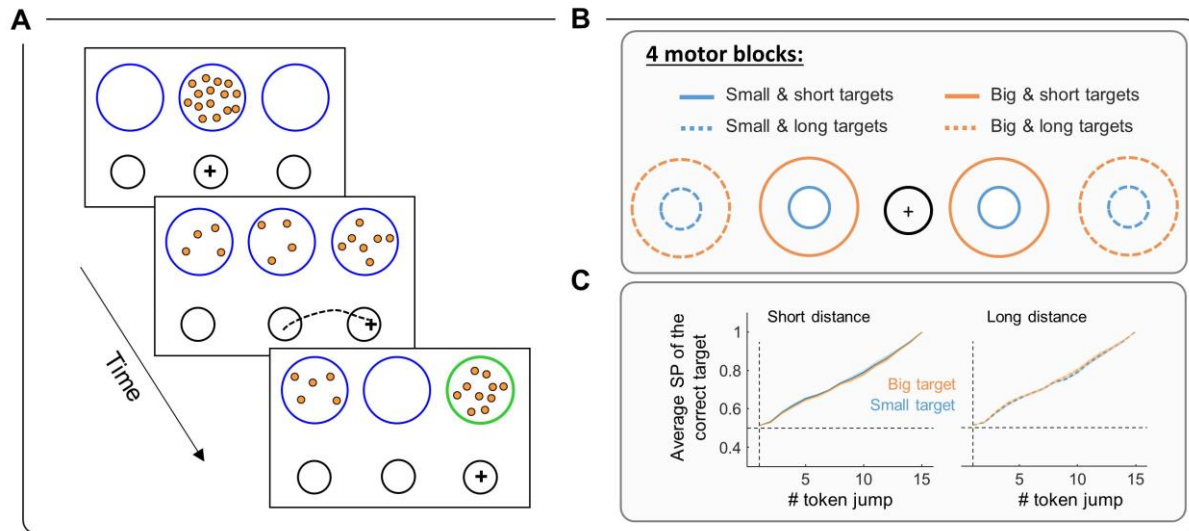

165

166 **Figure 2: Experimental design and conditions.** A. Time course of a trial in the tokens task.  
167 B. Motor conditions, i.e. movement target size and distance combinations. In distinct blocks  
168 of trials, both lateral targets could be either small and located close to the starting circle  
169 (black), small and located far from the starting circle, big and located close to the starting  
170 circle or big and located far from the starting circle. C. Average success probability profiles  
171 of trials experienced by subjects in each of the four motor conditions.

172

173 A trial was initiated when the subject moved and hold the lever into the small black central circle  
174 (starting position) for 500ms. Tokens then started to jump, one by one, every 200ms in one of the  
175 two possible lateral blue circles. The subjects' task was to decide which of the two lateral blue  
176 circles would receive the majority of the tokens at the end of the trial. They reported their decisions  
177 by moving the lever into the lateral black circle corresponding to the side of the chosen blue circle.  
178 Importantly, subjects were allowed to make and report their choice at any time between the first  
179 and the last jump. Arm movement duration could not exceed 800ms, irrespective of the motor  
180 block. If a movement exceeds 800ms (too slow) or if it reaches the target but fails to stop in it  
181 within 800ms (inaccurate), the trial is considered as a movement error trial. Once the choice is  
182 properly reported, the remaining tokens jumped more quickly to their final circles. In separate  
183 blocks of trials, this post-decision interval was set to either 20ms ("fast" decision block) or to  
184 150ms ("slow" decision block). The acceleration of the remaining tokens implicitly encouraged  
185 subjects to decide before all tokens had jumped into their respective lateral circles, to save time  
186 and increase their rate of reward. Note that each reaching movement carries a temporal cost with  
187 respect to reward rate maximization (see equation 3) because the remaining tokens accelerate only

## Impact of a demanding movement on decision-making

188 when action is completed. After holding the lever in the target for 500ms, a visual feedback about  
189 decision success or failure (the chosen decision circle turning either green or red, respectively) was  
190 provided after the last token jump. A 1500ms period (the inter-trial interval) preceded the following  
191 trial.

192 Before and after the tokens task described above, each subject also performed 100 trials of a  
193 delayed reach task (DR task). This task was identical to the tokens task except that there was only  
194 one lateral decision circle displayed at the beginning of the trial (either at the right or at the left  
195 side of the central circle with 50% probability) and all tokens moved from the central circle to this  
196 unique circle at a GO signal occurring after a variable delay ( $1000 \pm 150$ ms). They executed 2  
197 different motor blocks of 25 trials each before the tokens task and the 2 other motor blocks (25  
198 trials each) after the tokens task. This DR task was used to estimate the sum of the delays  
199 attributable to sensory processing of the stimulus display as well as to response initiation in each  
200 motor condition.

### 201 *Instructions*

202 In a given session, subjects were asked to complete one slow decision block and one fast decision  
203 block of the tokens task. To complete a decision block (either fast or slow), subjects had to make  
204 160 correct choices, indirectly motivating them to optimize successes per unit of time. After the  
205 first block was completed, a short break was offered to the subject. Within each decision block, the  
206 size of the movement targets and their distance from the starting circle, i.e. the motor blocks, were  
207 varied every 40 trials. In a session, each motor block was thus performed twice, once in the slow  
208 decision block, and once in the fast decision block.

209 Subjects performed two sessions (test-retest design), one a day and each of them separated by a  
210 maximum of 7 days. In session #1 subjects always started the tokens task in the slow decision block  
211 with the following succession of motor blocks: small/short, small/long, big/short and big/long;  
212 followed by the execution of the fast decision block with the same motor blocks order. To prevent  
213 any block-related confounding effect, the order of decision and motor blocks presentation was  
214 reversed in session #2. Before the first session, we explicitly described to the subjects the principle  
215 of each decision block, specifying that deciding quickly in the fast block was more advantageous  
216 in terms of time saving than in the slow block (because of the larger acceleration of the remaining  
217 tokens) but that such hasty behavior could also lead to more erroneous decisions. A short recall  
218 was provided before starting the second session. Because subjects were informed that they had to



## Impact of a demanding movement on decision-making

219 complete a given number of correct responses in each session, they were all aware that they were  
220 presented with a speed/accuracy trade-off in this task. A practice period consisting of performing  
221 20 tokens task trials in the slow decision and big/short motor blocks was proposed at the beginning  
222 of the first session, mainly allowing subjects to get familiar and comfortable with the manipulation  
223 of the lever on the tablet. Among the 23 subjects who participated in this study, two have been  
224 tested six and seven times. The additional sessions performed by these two subjects are not  
225 described in the present report.

### 226 *Data analysis*

227 All arm movement data were analyzed off-line using MATLAB (MathWorks). Reaching  
228 characteristics were assessed using subjects' movement kinematics. Horizontal and vertical  
229 position data were first filtered using a tenth degree polynomial filter and then differentiated to  
230 obtain a velocity profile. Onset and offset of movements were determined using a 3.75 cm/s  
231 velocity threshold. Peak velocity was determined as the maximum value between these two events  
232 and endpoint error was defined as the Euclidian distance separating the target center from the  
233 movement endpoint location. Dispersion of movement end points is visualized with confidence  
234 ellipses representing an iso-contour of the Gaussian distribution, defining the region that contains  
235 95% of all samples in each condition.

236 We computed at each moment during a trial the success probability  $p_i(t)$  associated with choosing  
237 each target  $i$ . For a total of 15 tokens, if at a particular moment in time the right target contains  $N_R$   
238 tokens, whereas the left contains  $N_L$  tokens, and there are  $N_C$  tokens remaining in the center, then  
239 the probability that the target on the right will ultimately be the correct one (i.e., the success  
240 probability of guessing right) is as follows:

$$p(R|N_R, N_L, N_C) = \frac{N_C!}{2^{N_C}} \sum_{k=0}^{\min(N_C, 7-N_L)} \frac{1}{k! (N_C - k)!} \quad (1)$$

241 To characterize the success probability profile of each trial, we calculated this quantity (with  
242 respect to either the correct target or the target ultimately chosen by the subject, depending on  
243 purposes) for each token jump. To ensure that difficulty of decisions was homogeneous among  
244 subjects and experimental conditions, we controlled the sequence of trials experienced by subjects  
245 in each session. Especially, we interspersed among fully random trials (20% of the trials in which  
246 each token is 50% likely to jump into the right or the left lateral circle) three special types of trials

## Impact of a demanding movement on decision-making

247 characterized by particular temporal profiles of success probability. Subjects were not told about  
248 the existence of these trials. 30 % of trials were so-called “easy” trials, in which tokens tended to  
249 move consistently toward one of the circles, quickly driving the success probability  $p_i(t)$  for each  
250 toward either 0 or 1. Another 30% of trials were “ambiguous”, in which the initial token movements  
251 were balanced, making the  $p_i(t)$  function close to 0.5 until later in the trial. The last special trial  
252 type was called “misleading” trials (20%) in which the 2-3 first tokens jumped into the incorrect  
253 circle and the remaining ones into the correct circle. In all cases, even when the temporal profile of  
254 success probability of a trial was predesigned, the actual correct target was randomly selected on  
255 each trial. Importantly, the sequence of trials was designed such as proportion of each trial type  
256 was similar in each decision and motor condition (Figure 2C).

257 To estimate the time at which subjects committed to their choice (decision time, DT) on each trial  
258 in the tokens task, we detected the time of movement onset, defining the subject’s reaction time  
259 (RT) and subtracted from it her/his mean sensory-motor delays (SM) estimated based on her/his  
260 reaction times in the same motor block of the delayed reach task performed the same day. Decision  
261 duration (DD) was computed as the duration between DT and the first token jump. Equation 1 was  
262 then used to compute for each trial the success probability at the time of the decision (SP).

263 Calculation of subjects’ accuracy criterion at decision time relies on the available sensory evidence  
264 at that time. Because it is very unlikely that subjects can calculate Equation 1, we computed a  
265 simple “first order” approximation of sensory evidence as the sum of log-likelihood ratios  
266 (SumLogLR) of individual token movements as follows (Cisek et al., 2009, page 11567, provides  
267 more details on this analysis):

$$SumLogLR(n) = \sum_{k=1}^n \log \frac{p(e_k|S)}{p(e_k|U)} \quad (2)$$

268 where  $p(e_k|S)$  is the likelihood of a token event  $e_k$  (a token jumping into either the selected or  
269 unselected target) during trials in which the selected target  $S$  is correct, and  $p(e_k|U)$  is its likelihood  
270 during trials in which the unselected target  $U$  is correct. The SumLogLR metric is thus proportional  
271 to the difference in the number of tokens which have moved in each circle before the moment of  
272 decision. To characterize the decision policy of a given subject in a given block of trials, we binned  
273 trials as a function of the total number of tokens that moved before the decision, and calculated the  
274 average SumLogLR for each bin.

## Impact of a demanding movement on decision-making

275 To quantify subjects' performance relative to the task objective, i.e. complete a given number of  
276 correct decisions, assuming they tried to compete each block as quickly as possible, we first  
277 calculated for correct and bad decisions the reward rate (RR), using a local definition (Haith et al.,  
278 2012; Thura et al., 2012) which corresponds to the expected number of correct choices per unit of  
279 time. This is computed as follows:

$$RR_n = \frac{SP_n}{DD_n + SM + MD_n + RD_n + ITI} \quad (3)$$

280 where  $SP_n$  is the probability that the choice made on trial  $n$  was correct,  $DD_n$  is the time taken to  
281 make the decision,  $SM$  is the sensori-motor delays (specific to each motor context but constant for  
282 a given session),  $MD_n$  is the movement duration,  $RD_n$  is the duration of the remaining token jumps  
283 after the target is reached, and  $ITI$  is the inter-trial interval (fixed at 1500ms). Then from the average  
284 reward rate computed in each motor block we calculated the average number of correct choices per  
285 minute and deducted from it the time necessary to complete a given number of correct choices in  
286 each condition of interest.

287 Comparisons of decision duration, success probability, movement duration, peak velocity,  
288 accuracy and block duration between conditions performed for each subject are statistically tested  
289 with Wilcoxon-Mann-Whitney (WMW, two-sided rank-sum) tests. The effect of motor condition  
290 on sensory evidence at decision time as a function of decision duration is statistically tested with  
291 analyses of covariance (ANCOVAs). For these analyses, very fast decisions made before token  
292 jump #4 are discarded. Decisions made before jump #4 were rare (see Thura, 2020) and success  
293 probability homogeneity (if subjects decide before token jump #4 it is likely because the first three  
294 tokens jumped into the same target) at that time makes data exclusion reasonable. Proportions of  
295 inadequate movements in small target conditions (small/short and small/long blocks) is statistically  
296 compared to proportion of inadequate movements in big target conditions (big/short and big/long  
297 blocks) for each subject with chi-square tests. For all statistical tests, the significance level is set a  
298 0.05.

299

300

301

## Impact of a demanding movement on decision-making

302

## RESULTS

303 *Effect of motor context on motor behavior in the tokens task*

304 As expected, the motor context in which decisions were reported strongly influenced subjects'  
305 movement properties and performance. First, we calculated the percentage of trials in which an  
306 inadequate movement was performed to express a choice, i.e. a movement exceeding 800ms (too  
307 slow) or failing to stop and maintain position in the target within 800ms (inaccurate). In the first  
308 session, most subjects (18/20) performed significantly more inadequate movements in the

309

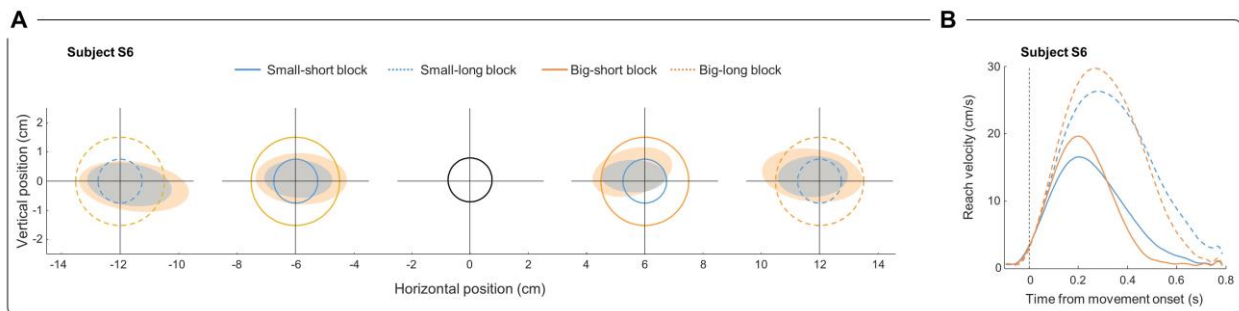

310

311 **Figure 3: Motor behavior in one example subject.** A. Panel shows the motor visual display  
312 depicted in Figure 2, along with shaded ellipses illustrating for each motor condition and side  
313 with respect to the start circle (black) the dispersion (an iso-contour of the Gaussian  
314 distribution) of one example subject reaching endpoints in the tokens task. Each ellipse  
315 contains 95% of the data in each condition, and trials include correct and inadequate (too  
316 slow or inaccurate) movements executed in the two sessions and in the two decision conditions  
317 (slow and fast). B. Reach velocity profiles of the same subject in the four motor conditions.  
318 Same color/style convention as in A. Only adequate movements are included.

319

320 small target (small/short and small/long blocks) condition compared to the big target (big/short and  
321 big/long blocks) condition (Chi-square tests,  $p < 0.05$ ). Movement “error” rates within blocks are  
322 the following across the population: small/long target blocks:  $18.8\% \pm 6.8$ ; small/short:  $5.5\% \pm 3.1$ ;  
323 big/long:  $4.5\% \pm 2.7$ ; big/short:  $1\% \pm 1.3$ . Despite an overall slight decrease, the same impact of  
324 motor constraint was observed on movement error rate during session #2: 19 out of 20 subjects  
325 made more inadequate movements in the small target compared to the big target condition (Chi-  
326 square tests,  $p < 0.05$ ), with the following error rates in each of the four motor contexts: small/long  
327 target blocks:  $16.7\% \pm 4.5$ ; small/short:  $4.8\% \pm 1.8$ ; big/long:  $2.35\% \pm 1.5$ ; big/short:  $1.1\% \pm 1.3$ .  
328 Figure 3A shows the dispersion of movement endpoints in one example subject who performed the

## Impact of a demanding movement on decision-making

329 tokens task in the four motor blocks. In this plot, correct and inadequate (too slow or inaccurate)  
330 movements trials are included. Confidence ellipses (containing 95% of all samples in each  
331 condition) largely extend outside of movement targets in small target trials, especially when targets  
332 are far from the starting center, whereas they almost entirely fit into movement targets in big target  
333 trials.

334 Then, we focused analyses on trials in which an adequate movement was performed to express a  
335 choice, irrespective of the outcome of that choice. As expected, reaching movement properties, in  
336 terms of velocity peak, duration and endpoint “error” (the distance between target center and  
337 movement offset location) were affected by the motor context in which movements were executed.  
338 Figure 3B shows for the same representative subject the reaching velocity profiles in trials sorted  
339 as a function of the four motor blocks. Unsurprisingly, movement velocity was largely higher and  
340 duration longer in long target (dotted lines) compared to short target trials (solid lines), regardless  
341 of the size of the target. The size of the target also modulated movement speed and duration but to  
342 a lesser extent. Movements were indeed slightly faster and shorter when executed toward big  
343 targets (orange lines) compared to those executed toward small targets (blue lines).

344 This effect of motor context on movement properties was observed on the vast majority of subjects  
345 performing either the tokens or the delayed reach (DR) task. To simplify comparisons in the  
346 following analyses, we grouped trials depending on (1) target size, defining two conditions, small  
347 versus big target conditions, regardless of target distance from the starting circle, and (2) target  
348 distance from the starting circle, defining two other conditions, short versus long target conditions,  
349 regardless of target size.

350 First, most of subjects reported decisions by making significantly faster (15 out of 20 subjects,  
351 WMW test,  $p < 0.05$ ), shorter, in terms of duration (17 out of 20 subjects, WMW test,  $p < 0.05$ ) and  
352 more dispersed (18/20, WMW test,  $p < 0.05$ ) movements in the big target compared to the small  
353 target condition (figure 4A). Second, all subjects reached long targets with significantly faster and  
354 longer movements compared to movements executed toward short targets (WMW test,  $p < 0.05$ ,  
355 figure 4B, left and middle panels). In this distance contrast, we observed that endpoint distances  
356 from target center were not as consistently modulated as in the size contrast, being significantly  
357 larger for the long target compared to the short target condition in only 9 out of 20 subjects (WMW  
358 test,  $p < 0.05$ , figure 4B, right panel). The same influence of target characteristics on reaching  
359 velocity, duration and accuracy was found in the DR task (not shown). Finally, the influence of

## Impact of a demanding movement on decision-making

360 target characteristics on movement parameters was similar in the two experimental sessions and in  
361 the two decision blocks (slow and fast, not shown).

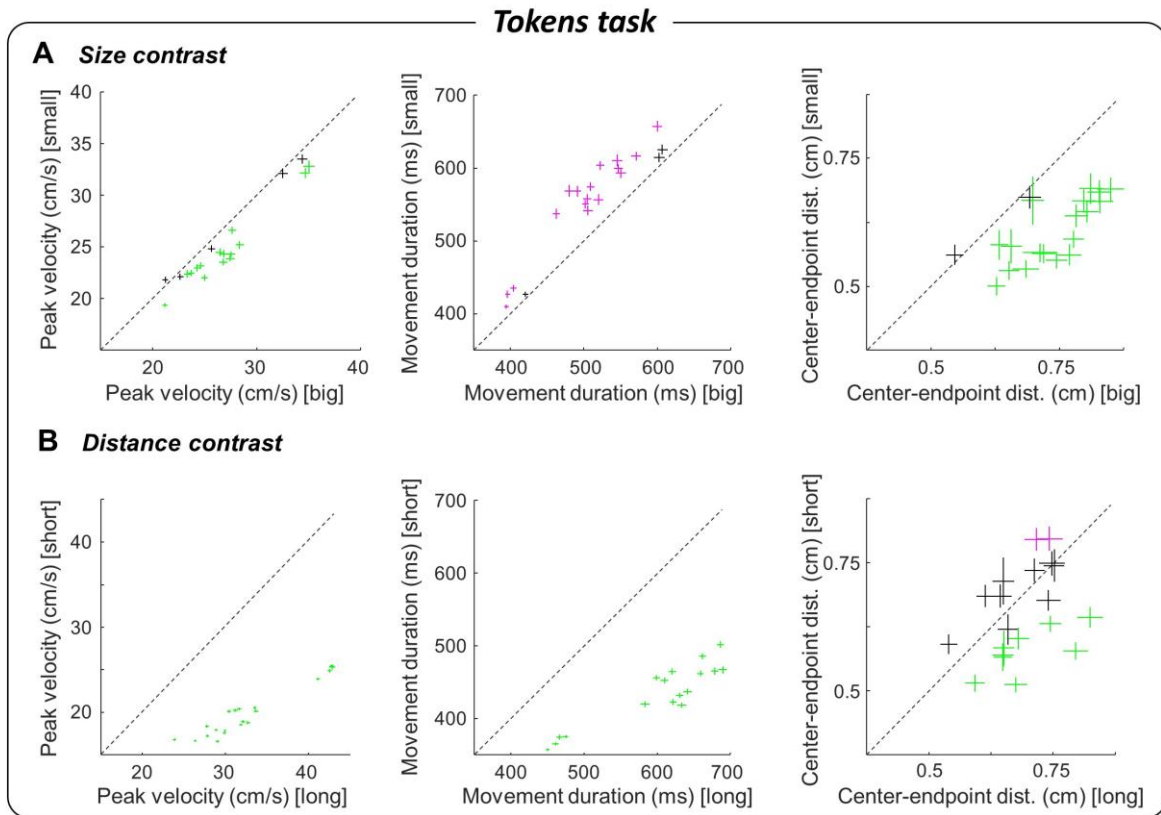

362

363 **Figure 4: Effect of motor context on population motor behavior.** A. Average reaching  
364 movement peak velocity (left), duration (middle) and target center-endpoint distance (right)  
365 of each subject during big target (big/short and big/long blocks, x-axis) and small target  
366 (small/short and small/long blocks, y-axis) conditions performed in the tokens task. Green  
367 (magenta) pluses indicate the mean and SE for subjects for whom data is larger (smaller) in  
368 the big target condition compared to the small target condition and the difference was  
369 significant (WMW test,  $p < 0.05$ ). Data include trials collected from both sessions #1 and #2,  
370 in both the slow and fast decision blocks. B. Same as A for trials executed in the long target  
371 (small/long and big/long blocks, x-axis) versus the short target (small/short and big/short  
372 blocks, y-axis) condition.

373

374 To summarize, manipulating the target characteristics in distinct blocks of trials successfully  
375 modulated reaching movement properties, encouraging subjects to either emphasize speed or  
376 accuracy to execute movements in these blocks to express their choices. In the following section,  
377 we assess whether or not these context-dependent adjustments of motor parameters influenced the  
378 decision policy leading to the actions executed to report choices.

## Impact of a demanding movement on decision-making

### 379 *Effect of motor context on subjects' decision behavior*

380 To determine the potential impact of movement context on decision policy, we first analyzed  
381 subjects' decision duration (regardless of the decision outcome) by sorting trials depending on  
382 target characteristics, irrespective of the session and the decision condition (slow or fast).

383 By first comparing decisions made in big (big/short and big/long) versus small (small/short and  
384 small/long) target trials, we found that decisions were overall shorter in the small target compared  
385 to the big target condition (1099 versus 1154ms). Importantly, difference is significant for half of  
386 the population (WMW test,  $p < 0.05$ , figure 5A, left panel). Only one subject behaved the opposite  
387 way, making significantly faster choices when allowed to report them with fast, less accurate  
388 reaching movements. Importantly, we found virtually no difference between the average decision  
389 difficulties (quantified as success probability profiles, see Methods and figure 2C) in the two motor  
390 conditions, excluding a role of the sensory evidence experienced by the subjects in the difference  
391 of decision duration observed between small and big target contexts. Did this shortening of decision  
392 duration affect choice accuracy? To answer that question, we analyzed the amount of sensory  
393 evidence that subjects needed to commit to their choices (i.e. their accuracy criterion, computed as  
394 the sum of the log-likelihood ratios, see Methods), as a function of decision duration for the two  
395 motor conditions, small and big target trials (Figure 5A, middle panel). First, the level of sensory  
396 evidence that subjects required before committing to a choice decreased as a function of decision  
397 duration, irrespective of motor conditions (ANCOVA, SumLogLR, time effect,  $F_{(1,347)} = 164$ ,  $p <$   
398  $0.0001$ ). This observation suggests that the more time is elapsing over the time course of a trial,  
399 the more decisions rely on a sensory-agnostic signal. In our previous studies as well as in others,  
400 this decreasing accuracy criterion is interpreted as a behavioral signature of an urgency-gating  
401 mechanism of decision-making, which in short describes the decision variable as the combination  
402 of sensory evidence with an urgency signal and the decision is made when the decision variable  
403 reaches a constant threshold (Cisek et al., 2009; Thura et al., 2012).

404 Importantly for the present report, we found that the accuracy criterion of subjects performing the  
405 tokens task in small target trials was significantly lower than in big target trials, for any decision  
406 made after token jump #3 (ANCOVA, SumLogLR, target size effect,  $F_{(1,347)} = 4.63$ ,  $p = 0.03$ ). This  
407 indicates that subjects were more willing to tolerate less sensory evidence to make their choices in  
408 small target compared to big target trials. As a consequence, decisions were usually less likely to  
409 be correct in the small target compared to the big target context (Figure 5A, right panel). This

## Impact of a demanding movement on decision-making

410 decrease of success probability in small target trials was significant in 7 out 10 subjects showing a  
 411 significant decrease of decision duration as a function of target size (WMW test,  $p < 0.05$ ).  
 412

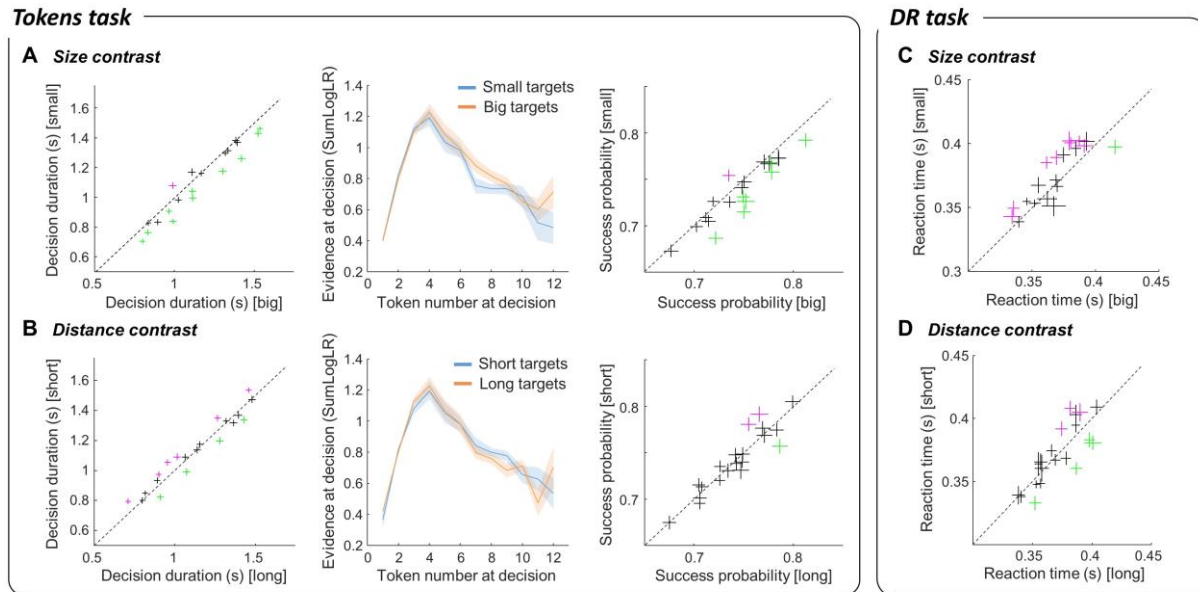

413

414 **Figure 5 : Effect of motor context on decision behavior.** A. Left: Average decision duration  
 415 of each subject during big (x-axis) and small (y-axis) target conditions performed in the tokens  
 416 task. Same convention as in Figure 4. Middle: Average ( $\pm$  SE) evidence at decision time across  
 417 subjects as a function of decision duration in the small (blue) and the big (orange)  
 418 target conditions of the tokens task. Right: Mean success probability of each subject during big (x-  
 419 axis) and small (y-axis) target conditions performed in the tokens task. Same convention as in  
 420 Figure 4. Data include trials collected from both sessions #1 and #2, in both the slow and fast  
 421 decision blocks. B. Same as A for trials executed in the long versus short target conditions. C.  
 422 Average reaction time of each subject during big (x-axis) and small (y-axis) target conditions  
 423 performed in the delayed reach task. D. Same as C for trials executed in the long (x-axis)  
 424 versus the short (y-axis) target condition.  
 425

426 We next compared decision durations in short versus long target trials, a contrast that strongly  
 427 modulates movement speed of all subjects (Figure 4B, left panel). We found that the impact of  
 428 target distance, and thus movement speed, on decision duration was less consistent at the  
 429 population level compared to the impact of target size described above (Figure 5B, left panel).  
 430 Indeed, we observed that 6 subjects made significantly longer decisions in the short target  
 431 compared to the long target condition (WMW test,  $p < 0.05$ ), 4 subjects behaved the opposite way  
 432 (WMW test,  $p < 0.05$ ), and the 10 remaining ones did not behave differently, in terms of decision  
 433 duration, between the two motor conditions. We also found that target distance did not significantly



## Impact of a demanding movement on decision-making

434 influence the quantity of sensory information used by subjects to commit to their choice  
435 (ANCOVA, SumLogLR, target size effect,  $F_{(1,346)} = 0.13$ ,  $p = 0.72$ , Figure 5B, middle panel), and  
436 the success probability of these choices was only rarely significantly modulated as a function of  
437 target distance (Figure 5B, right panel).

438 We next analyzed the effect of target size and distance on subjects' reaction times (RT) in the  
439 delayed reach (DR) task. In the DR task, no volitional commitment needed to be made as subjects  
440 were instructed with both the correct target and when to execute their response (see Methods). In  
441 this task we found that subjects' RTs were overall longer in small target compared to big target  
442 trials (375 versus 367ms), with a significant difference for 8 out of 20 subjects (WMW test,  
443  $p < 0.05$ ), and only one subject behaving significantly the opposite way (Figure 5C). Interestingly,  
444 we found a significant correlation between the modulation of decision duration by target size in the  
445 tokens task and the modulation of reaction time in the same conditions in the DR task. In other  
446 words, the more subjects expedited decisions in the small target condition of the tokens tasks, the  
447 more they slowed down their response initiation in the same condition in the DR task (Pearson  
448 correlation,  $r = -0.495$ ,  $p = 0.026$ , Figure 6). By contrast, reaction times were less homogeneously  
449 affected by the distance condition in the DR task. Four subjects reacted faster in short compared to  
450 long target blocks, and 3 subjects behaved the opposed way (WMW test,  $p < 0.05$ , Figure 5D).

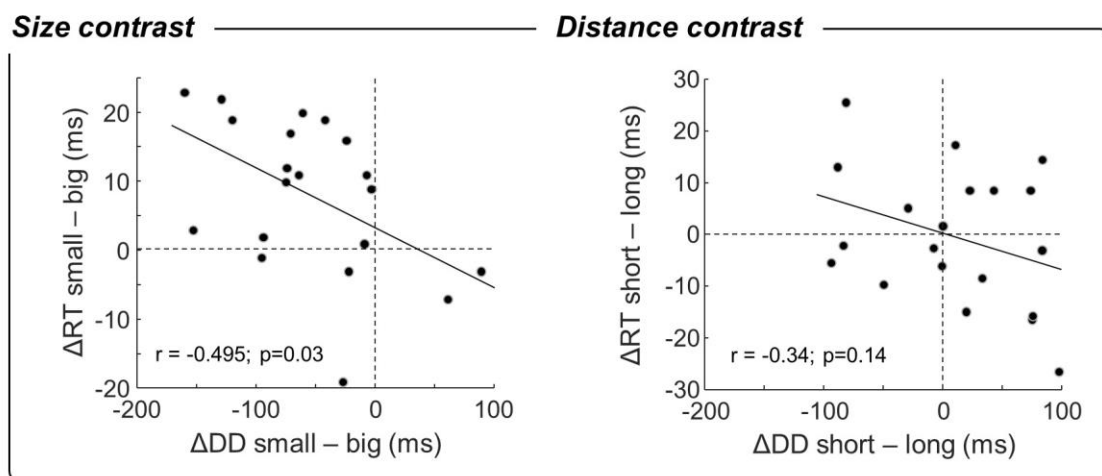

451  
452 **Figure 6: Relationship between the effect of motor context on decision and instructed tasks.**  
453 *Left: Correlation between the difference of decision duration in small versus big target*  
454 *conditions in the tokens task (x-axis) and the difference of reaction time in the same*  
455 *conditions in the delayed reach task (y-axis). Each dot shows data from one individual subject. Right:*  
456 *Same as Left for the distance contrast (short versus long target conditions).*

## Impact of a demanding movement on decision-making

457 To assess whether the effect of target size on decision policy was dependent on the decision context,  
458 i.e. the slow or fast decision blocks of the tokens task, we computed subjects' decision duration,  
459 success probability and sensory evidence at decision time for each of the two size conditions,  
460 separately for the two decision blocks. In a recent report (Thura, 2020), we describe in detail  
461 subjects' behavior in the two decision conditions. Quickly, the “slow” decision block of trials  
462 encourages slow and accurate decisions because the tokens that remain in the central decision circle  
463 after movement completion accelerate only a little compared to the pre-decision period (see  
464 Methods).

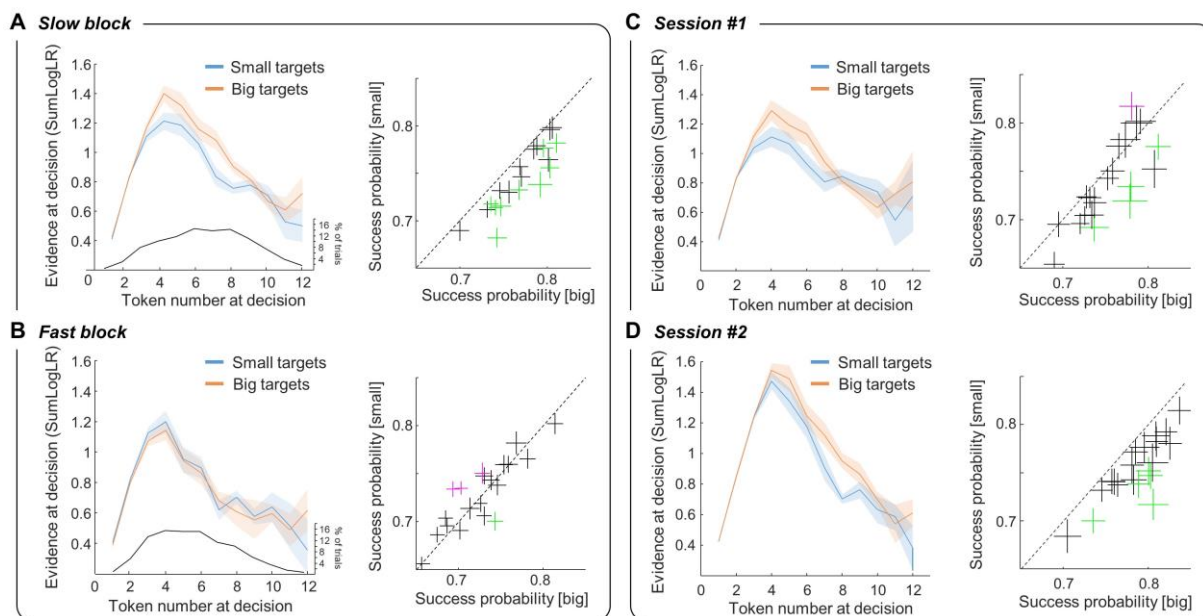

465

466 **Figure 7: Effect of motor context on decision accuracy depending on decision context and**  
467 **experience.** A. Left: Average ( $\pm$  SE) evidence at decision time across subjects as a function of  
468 decision duration in small (blue) and big (orange) target conditions performed in the “slow”  
469 decision block of the tokens task. The black line below shows the average distribution of  
470 decision duration across subjects in the slow block. Right: Average success probability of each  
471 subject during big (x-axis) and small (y-axis) target conditions performed in the slow decision  
472 block of the tokens task. Data from both sessions #1 and #2 are included. Same convention as  
473 in Figure 4. B. Same as A for decisions made in the “fast” decision block of the tokens task.  
474 C. Same as A for decisions made in the first session, including only slow decision blocks. D.  
475 Same as C for decisions made during the second session.

476

477 By contrast, in the “fast” block of trials, the remaining tokens accelerate a lot, allowing subjects to  
478 potentially save a lot of time by deciding quickly, permitting to eventually maximize their reward  
479 rate. In Thura, 2020 we showed that subjects behaved accordingly, making faster (1028 vs 1229ms

## Impact of a demanding movement on decision-making

480 across subjects) and less accurate (0.87 versus 0.97) decisions in the fast block compared to the  
481 slow block of trials (see the average distributions of decision duration across subjects in the two  
482 decision blocks in Figure 7A,B). In the present report, we demonstrate that the impact of target size  
483 on decision policy, especially accuracy, is larger in the slow block than in the fast block of trials.  
484 Indeed, decision durations were significantly modulated by target size in 8 out of 20 subjects  
485 performing the slow block whereas they were modulated in only 6 subjects performing the tokens  
486 task in the fast condition (WMW test,  $p < 0.05$ ). Moreover, the accuracy criterion was significantly  
487 higher for big target compared to small target trials in the slow block (ANCOVA, SumLogLR, size  
488 effect,  $F_{(1,345)} = 13.6$ ,  $p = 0.0003$ ) but not in the fast block ( $F_{(1,298)} = 0.1$ ,  $p = 0.75$ , Figure 7A,B, left  
489 panels). As a consequence, success probability was strongly influenced by target size in the slow  
490 block (significantly modulated in 9 out of 20 subjects, WMW test,  $p < 0.05$ ) whereas effects were  
491 more balanced in the fast blocks (Figure 7A,B, right panels).

492 Next, we analyzed the effect of target size on decision policy depending on the level of experience  
493 of subjects in the tokens task. To do this, we computed subjects' decision duration, success  
494 probability and sensory evidence at decision time for decisions made in the slow decision block for  
495 each of the two target size conditions, separately for the two experimental sessions. Overall, we  
496 found that the impact of target size on decision policy did not strongly evolve with training.  
497 Decision durations were slightly more modulated by target size in the first session than in the  
498 second sessions (5/20 and 3/20 subjects with a significant effect of target size on decision duration  
499 in session #1 and #2, respectively; WMW test,  $p < 0.05$ ), but accuracy criterion (ANCOVA,  
500 SumLogLR, size effect,  $F_{(1,320)} = 2.5$ ,  $p = 0.1$  in session #1;  $F_{(1,330)} = 10.5$ ,  $p = 0.0013$  in session #2)  
501 and to a lesser extent, success probability (4/20 and 5/20 subjects with a significant effect of target  
502 size on decision duration in session #1 and #2, respectively; WMW test,  $p < 0.05$ ) were more  
503 affected by target size in session #2 compared to session #1 (Figure 7C,D).

504

## Impact of a demanding movement on decision-making

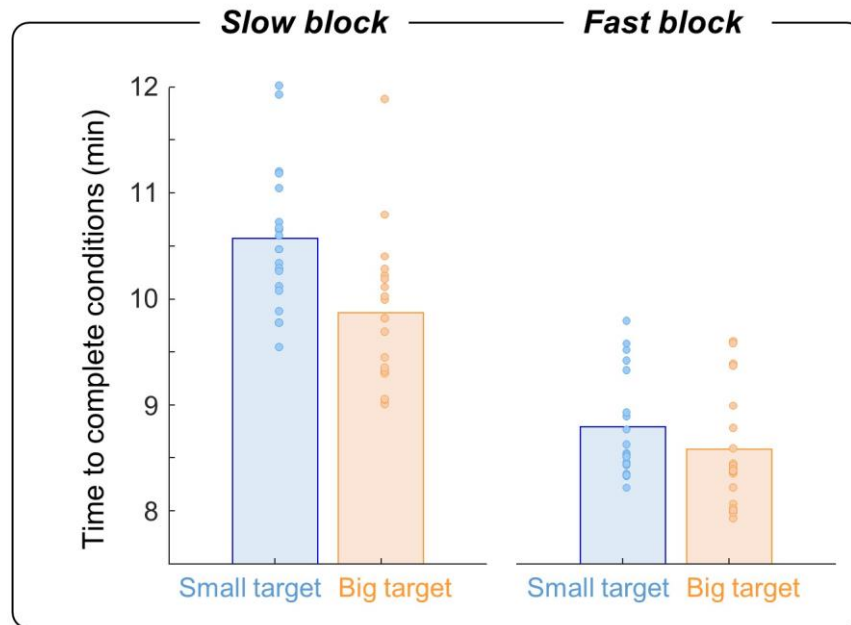

505

506 **Figure 8: Influence of target size on the expected duration of blocks.** Bars show the average  
507 expected time necessary to complete a block of 80 trials, computed based on reward rate in  
508 each condition, in the small (blue) and big (orange) target block across subjects and sessions,  
509 in the slow (left) and fast (right) decision block of trials. Dots illustrate individual data.

510

511 Finally, we evaluated the impact of the faster and less accurate choices in the small target condition  
512 compared to the big target condition on subjects' performance in the tokens task. Because it has  
513 been shown that subjects seek to optimize their rate of correct responses rather than their absolute  
514 accuracy (Balci et al., 2011), performance is estimated as the duration that subjects needed to  
515 complete each motor block. Thus, by calculating the rate of reward and deducting from it the  
516 amount of time necessary to complete the different motor blocks in each session (see Methods),  
517 we found that this duration was significantly longer in the small target condition compared to the  
518 big target condition across subjects, regardless of the session performed, when subjects performed  
519 the tokens task in the slow decision block (WMW test,  $p = 0.0013$ , Figure 8, left panel). By contrast,  
520 we found no significant difference of block duration between small and big target conditions in the  
521 fast decision block of trials (WMW test,  $p = 0.11$ ).

522

523

## Impact of a demanding movement on decision-making

524

### DISCUSSION

525 In this study, we assessed whether the motor context in which perceptual decisions between actions  
526 are made influences human subjects' decision strategy, as predicted by the recently proposed  
527 "shared regulation" hypothesis (Thura et al., 2014). This model conceives decision and action as a  
528 continuum, regulated by unspecific signals. As a consequence, a motor context favoring vigorous  
529 movements should be preceded by fast decisions because of the activation of one unique  
530 invigoration signal possibly computed in the basal ganglia (Cisek and Thura, 2018). We found that  
531 motor context indeed often influences decision-making but contrary to the prediction of the shared  
532 regulation hypothesis, decisions preceding slow and accurate actions were faster, rather than  
533 slower, compared to decisions made in blocks allowing more vigorous and less accurate actions.

#### 534 *Motor costs influence motor and perceptual decision-making*

535 The present results first add to the many recent observations that challenge the classic view of  
536 behavior organization, inherited from cognitive psychology, in which perception, decision and  
537 action are considered as temporally separate and serial processes (Pylyshyn, 1984). Indeed, in  
538 ecological scenarios, sensory or value-based decisions are very often expressed by actions that are  
539 themselves associated with risks and costs. For instance, a monkey deciding between reaching  
540 toward a grape or a nut may prefer the nut but time and energy expenditure associated with opening  
541 its shell may rather encourage him to go for the grape. Because it has been extensively  
542 demonstrated that the brain tends to control behavior in such a way that the expected value of a  
543 choice is maximized while all types of cost are minimized (Neumann and Morgenstern, 1944;  
544 Todorov and Jordan, 2002; Gold and Shadlen, 2007), any potentially penalizing factor, including  
545 motor costs, should influence the perceptual judgement leading to a potential reward.

546 In the past decade, several studies have demonstrated that motor costs influence decision-making  
547 when choices only rely on movement properties (i.e. motor decisions). Cos and colleagues showed  
548 that when humans make rapid choices between reaching actions, they tend to choose the one that  
549 carries the lowest biomechanical cost (Cos et al., 2011, 2014). Morel and colleagues found that  
550 biomechanics affects action selection too, but among duration, amplitude, direction and force, they  
551 observed that movement duration is perceived as the greatest cost by subjects (Morel et al., 2017).  
552 Finally, Michalski and colleagues observed that movement amplitude and direction influence the

## Impact of a demanding movement on decision-making

553 probability of switching from one ongoing movement to another in a common real-life scenario  
554 where one has to decide while already acting (Michalski et al., 2020).

555 Other work addressed the effects of motor costs on decision-making beyond purely motor choices,  
556 i.e. when the decision primarily relies on perceptual or value information, as in the present work.  
557 In three of these experiments using the random dots motion discrimination task, data indicate an  
558 effect of motor constraints on non-motor decision-making. Burk and colleagues demonstrated that  
559 physical effort affects the proportion of changes of mind made by subjects during the deliberation  
560 period: the more the change of mind requires a significant energetic cost, the less subjects are  
561 willing to perform it (Burk et al., 2014). Another study showed that asymmetric biomechanical  
562 cost biases perceptual decisions, with subjects more systematically choosing targets associated with  
563 movements of lower cost, even if these choices were detrimental to accuracy (Marcos et al., 2015).  
564 In agreement with this observation, Hagura and colleagues demonstrated that motion  
565 discrimination is influenced by the physical resistance applied to the response. Intriguingly, they  
566 showed that motor costs also bias vocally-expressed judgments, suggesting that actions changed  
567 how subjects perceived the stimuli themselves (Hagura et al., 2017).

568 It is important to note that in these three studies, each of the two potential targets was assigned a  
569 specific motor cost during a given choice. By contrast, in the present work, the two targets were  
570 always associated with the same motor cost, and that cost was varied between blocks of trials. The  
571 present report is thus to our knowledge the first to show that the motor context in which a movement  
572 is performed influences the strategy of subjects during decision-making.

### 573 *A flexible mechanism for regulating decision and movement durations*

574 Decisions about actions typically include a period of deliberation that ends with the commitment  
575 to a choice, which then leads to the overt expression of that choice through action execution, at the  
576 end of which the reward can be at last consumed. Because decision and action processes are so  
577 inextricably linked, it is natural to imagine that they could at least partly share operating principles  
578 in order to maximize the utility of behavior. Decision and action could indeed be considered as a  
579 continuum during which regulation signals would affect both processes agnostically, in a unified  
580 manner. In agreement with this hypothesis, it has been proposed that movement selection,  
581 preparation and execution are parameterized following economical rules, varying depending on  
582 utility estimation: high valued options lead to faster reaction times and movement speed, and high-

## Impact of a demanding movement on decision-making

583 perceived effort discount option's value, leading to slower reaction and longer movements  
584 (Kawagoe et al., 1998; Wickler et al., 2000; Shadmehr et al., 2010, 2016, 2019; Haith et al., 2012;  
585 Choi et al., 2014; Morel et al., 2017; Reppert et al., 2018; Summerside et al., 2018; Yoon et al.,  
586 2018; Revol et al., 2019).

587 Our own previous results support this hypothesis of a coordination between decision and action  
588 durations during behavior. For instance, within fixed decision and motor contexts, both humans  
589 and monkeys shorten their movement duration in trials in which decision duration are prolonged,  
590 as if extended deliberation duration was compensated by increasing the action speed so that the  
591 next opportunity can be encountered more quickly. Between decision contexts, choices made in a  
592 fast speed-accuracy trade-off regime are usually followed by faster movements compared to those  
593 made in a regime encouraging slow and accurate choices (Thura et al., 2014; Thura, 2020).  
594 Altogether, these observations indicate that the level of urgency at which a decision is made directly  
595 influences movement vigor, suggesting that decision and movement durations are determined by  
596 a global decision urgency/movement vigor signal that invigorates behavior in order to control  
597 reward rate (Cisek and Thura, 2018; Carland et al., 2019). However, a missing test of the shared  
598 regulation hypothesis required to vary the motor context in which a decision is made and assess  
599 whether or not a motor context permitting execution of vigorous movements to express choices  
600 leads to faster decisions compared to the same difficult decisions made in a demanding motor  
601 context, imposing slow and accurate movements. Contrary to this prediction, we did not observe a  
602 robust and consistent effect of movement speed per se on decision duration and accuracy (by  
603 comparing short versus long target conditions, Figure 5B). Instead, data indicate that target size  
604 imposes a motor accuracy cost that is tackled by some subjects by shortening the deliberation  
605 period (Figure 5A) so that more time is available to prepare the following movement execution.  
606 This interpretation is supported by a post-experiment interview during which most of participants  
607 declared having consciously expedited and thus "sacrificed" their decisions to better prepare action  
608 execution in small target trials. Thus, we demonstrate in the present study that there is no  
609 unconditional and unidirectional relationship between action vigor and decision duration, contrary  
610 to the prediction of the shared regulation hypothesis. Instead, our results claim for a flexible  
611 mechanism in which decision and action durations are regulated by independent, yet interacting,  
612 decision urgency and movement vigor signals. Such a flexibility is certainly advantageous given

## Impact of a demanding movement on decision-making

613 the inherent complexity of the many variables interrelationships at play during goal-directed  
614 behavior, where no single decision policy is guaranteed to maximize reward rate across all contexts.  
615 Such flexibility is well illustrated by the relationship between the effect of target size on decision  
616 duration in the tokens task and the effect of target size on reaction time in the delayed reach (DR)  
617 task. The significant correlation (Figure 6) indicates that subjects who are slower to initiate a  
618 movement in the small target trials of the DR task are also the subjects who adjust their decision  
619 policy the most in these difficult trials in the tokens task. The former result is consistent with data  
620 suggesting that effortful movements discount reward value, thus motivation, delaying the initiation  
621 of movements (Summerside et al., 2018; Shadmehr et al., 2019). This relationship thus suggests  
622 that economic principles governing behavior utility in non-decision tasks extends to decision-  
623 making. It also indicates that when the task difficulty mainly relies on movement execution, as in  
624 the DR task, movement effort slows down reaction times whereas when task difficulty is shared  
625 between decision and action, as in the tokens task, movement effort influences the decision process  
626 in an opposite way. What could be the relevance of this intriguing behavior in terms of  
627 performance?

### 628 *Impact of a demanding movement on reward rate*

629 The present data indicate that movement accuracy requirement, more than speed or duration, forced  
630 some subjects to hasten their decisions. It seems that they took advantage of the potentially long  
631 deliberation period permitted in the task (up to 3s) to sometimes shorten their judgment in order to  
632 focus on the following movement execution. Interestingly, such adjustment only occurred in blocks  
633 of trials in which decisions were encouraged to be conservative (“slow” decision blocks, Figure 7).  
634 Indeed, the large and very profitable, in terms of reward rate, shortening of decision durations  
635 observed in the “fast” decision blocks (Figure 8) probably constrained decision policy too much,  
636 preventing any other adjustments of behavior. It is also important to remember that in the tokens  
637 task, deciding more quickly does not provide additional time to execute the movement, the  
638 maximum movement duration being fixed at 800ms regardless of subjects’ reach onset timing.  
639 How then can one explain this suboptimal strategy? One possibility is that our limited cognitive  
640 and motor resources imposed a necessary trade-off between decision and action when task  
641 constraints were too demanding (Wickens, 2002). In this view, subjects had to choose between  
642 allocating resources on decision-making while taking the risk of producing inaccurate movements  
643 or rather sacrificing decision-making to presumably better prepare and execute their movements.



## Impact of a demanding movement on decision-making

644 Knowing that in ecological situations as in the present task, a movement usually follows the  
645 decision, it is possible that subjects gave priority to the action process considering that movement  
646 failure would prevent reward acquisition even if the decision was correct. Although it may be  
647 advantageous in terms of reward rate to decide very quickly while sacrificing a little bit of precision  
648 (see equation 3), as observed when humans and monkeys decide faster in the fast compared to the  
649 slow decision block of trials (Figure 8 and Thura et al., 2014; Thura, 2020), our results show  
650 however that the strategy consisting of sacrificing decision accuracy to execute accurate  
651 movements led to a drop of reward rate compared to a condition in which such adjustment was not  
652 necessary. This is probably because in small target trials, the probability of choosing the correct  
653 target decreased, even if the amount of time saved during the deliberation period compensated the  
654 longer movements made in this condition (Figure 4).

### 655 *Possible neurophysiological origin of the decision and action regulation mechanism*

656 The interaction between the decision and action regulations provides a clue to the neural origins of  
657 the signals implicated in this mechanism. Interacting decision urgency and movement vigor signals  
658 would be expected to originate from a region that projects to a wide range of cortical areas to  
659 influence both decision-making and action execution. In this respect, the basal ganglia (BG)  
660 provide a natural candidate. The BG have long been functionally associated with the regulation of  
661 motivated behavior and reinforcement learning for maximizing reward (Graybiel, 2005; Frank,  
662 2011), and multiple lines of neuropsychological, neurological and neurophysiological evidence  
663 suggest that effort expenditure and movement vigor are largely under the control of activity within  
664 a variety of BG structures, including the striatum, substantia nigra, ventral pallidum, and the globus  
665 pallidus (Mazzoni et al., 2007; Turner and Desmurget, 2010; Rueda-Orozco and Robbe, 2015;  
666 Dudman and Krakauer, 2016; Thura and Cisek, 2017; da Silva et al., 2018; Yttri and Dudman,  
667 2018; Carland et al., 2019; Fobbs et al., 2020). All these studies along with results from the present  
668 report suggest a mechanism in which different populations of cells, located in the BG output nuclei,  
669 vary their activity to adjust both decision and motor durations under specific circumstances, in  
670 order to control the rate of reward. Future experiments designed to record activity of individual BG  
671 cells during decision-making between actions in different decision and motor contexts should allow  
672 to better understand the neural correlates of this regulation mechanism.

673

## Impact of a demanding movement on decision-making

### 674 *Limitations*

675 A limitation of the present study, as often in investigations of primate cognition and behavior,  
676 relates to the between-subject variability of the results. The average decision duration ranges from  
677 ~700ms to about 1600ms depending on subjects (Figure 5), despite the fact that participants faced  
678 the same trials under identical conditions. This indicates individual “traits” of decision behavior.  
679 Similarly, a subgroup of four subjects were more vigorous than the others to execute their  
680 movements (Figure 4). While revealing probable unaddressed phenomena, these multiple levels of  
681 variability are still compatible with a flexible regulation mechanism of decision and action  
682 durations that would be idiosyncratic in nature. Another limitation relates to the absence of decision  
683 data analysis in inaccurate or slow movement trials for methodology reasons. In the present report  
684 we show that a difficult movement is often preceded by a fast and inaccurate decision, but this  
685 occurs when movements are properly executed. It is possible that subjects sometimes allocated  
686 their attention on the decision process, leading in that case to a “sacrifice” of motor control,  
687 resulting in failed movements. Further experiments or analyses are needed to reveal which of the  
688 two processes, the decision or the action, is typically prioritized by participants in this kind of  
689 demanding goal-directed behavior.

690

691

692

693

694

## ACKNOWLEDGMENTS

695 The authors wish to thank Sonia Alouche and Jean-Louis Borach for effective administrative  
696 assistance, Frédéric Volland for his expertise during the technical preparation of this experiment,  
697 and Martine Meunier for helpful suggestions on the manuscript.

## Impact of a demanding movement on decision-making

### REFERENCES

- 698
- 699 Balci F, Simen P, Niyogi R, Saxe A, Hughes JA, Holmes P, Cohen JD (2011) Acquisition of  
700 decision making criteria: reward rate ultimately beats accuracy. *Atten Percept Psychophys*  
701 73:640–657.
- 702 Bogacz R, Hu PT, Holmes PJ, Cohen JD (2010) Do humans produce the speed–accuracy trade-off  
703 that maximizes reward rate? *Quarterly Journal of Experimental Psychology* 63:863–891.
- 704 Burk D, Ingram JN, Franklin DW, Shadlen MN, Wolpert DM (2014) Motor Effort Alters Changes  
705 of Mind in Sensorimotor Decision Making Kiebel S, ed. *PLoS ONE* 9:e92681.
- 706 Carland MA, Thura D, Cisek P (2019) The Urge to Decide and Act: Implications for Brain Function  
707 and Dysfunction. *Neuroscientist*:107385841984155.
- 708 Choi JES, Vaswani PA, Shadmehr R (2014) Vigor of Movements and the Cost of Time in Decision  
709 Making. *Journal of Neuroscience* 34:1212–1223.
- 710 Churchland AK, Kiani R, Shadlen MN (2008) Decision-making with multiple alternatives. *Nat*  
711 *Neurosci* 11:693–702.
- 712 Cisek P, Puskas GA, El-Murr S (2009) Decisions in Changing Conditions: The Urgency-Gating  
713 Model. *Journal of Neuroscience* 29:11560–11571.
- 714 Cisek P, Thura D (2018) Neural circuits for action selection. In: *Reach-to-grasp behavior: Brain,*  
715 *behavior, and modelling across the life span, Daniela Corbetta and Marco Santello., pp 91–*  
716 *118 Frontiers of developmental science. Taylor & Francis Group.*
- 717 Cos I, Bélanger N, Cisek P (2011) The influence of predicted arm biomechanics on decision  
718 making. *Journal of Neurophysiology* 105:3022–3033.
- 719 Cos I, Duque J, Cisek P (2014) Rapid prediction of biomechanical costs during action decisions.  
720 *Journal of Neurophysiology* 112:1256–1266.
- 721 Cos I, Medleg F, Cisek P (2012) The modulatory influence of end-point controllability on decisions  
722 between actions. *Journal of Neurophysiology* 108:1764–1780.
- 723 da Silva JA, Tecuapetla F, Paixão V, Costa RM (2018) Dopamine neuron activity before action  
724 initiation gates and invigorates future movements. *Nature* 554:244–248.
- 725 Ditterich J (2006) Evidence for time-variant decision making. *European Journal of Neuroscience*  
726 24:3628–3641.
- 727 Dudman JT, Krakauer JW (2016) The basal ganglia: from motor commands to the control of vigor.  
728 *Current Opinion in Neurobiology* 37:158–166.

## Impact of a demanding movement on decision-making

- 729 Fobbs WC, Bariselli S, Licholai JA, Miyazaki NL, Matikainen-Ankney BA, Creed MC, Kravitz  
730 AV (2020) Continuous Representations of Speed by Striatal Medium Spiny Neurons. *J*  
731 *Neurosci* 40:1679–1688.
- 732 Frank MJ (2011) Computational models of motivated action selection in corticostriatal circuits.  
733 *Current Opinion in Neurobiology* 21:381–386.
- 734 Gold JI, Shadlen MN (2007) The Neural Basis of Decision Making. *Annu Rev Neurosci* 30:535–  
735 574.
- 736 Graybiel AM (2005) The basal ganglia: learning new tricks and loving it. *Current Opinion in*  
737 *Neurobiology* 15:638–644.
- 738 Hagura N, Haggard P, Diedrichsen J (2017) Perceptual decisions are biased by the cost to act. *eLife*  
739 6:e18422.
- 740 Haith AM, Reppert TR, Shadmehr R (2012) Evidence for Hyperbolic Temporal Discounting of  
741 Reward in Control of Movements. *Journal of Neuroscience* 32:11727–11736.
- 742 Kawagoe R, Takikawa Y, Hikosaka O (1998) Expectation of reward modulates cognitive signals  
743 in the basal ganglia. *Nat Neurosci* 1:411–416.
- 744 Kira S, Yang T, Shadlen MN (2015) A Neural Implementation of Wald’s Sequential Probability  
745 Ratio Test. *Neuron* 85:861–873.
- 746 Malhotra G, Leslie DS, Ludwig CJH, Bogacz R (2017) Overcoming indecision by changing the  
747 decision boundary. *Journal of Experimental Psychology: General* 146:776–805.
- 748 Malhotra G, Leslie DS, Ludwig CJH, Bogacz R (2018) Time-varying decision boundaries: insights  
749 from optimality analysis. *Psychon Bull Rev* 25:971–996.
- 750 Marcos E, Cos I, Girard B, Verschure PFMJ (2015) Motor Cost Influences Perceptual Decisions  
751 Gribble PL, ed. *PLoS ONE* 10:e0144841.
- 752 Mazzoni P, Hristova A, Krakauer JW (2007) Why Don’t We Move Faster? Parkinson’s Disease,  
753 Movement Vigor, and Implicit Motivation. *Journal of Neuroscience* 27:7105–7116.
- 754 Michalski J, Green AM, Cisek P (2020) Reaching decisions during ongoing movements. *Journal*  
755 *of Neurophysiology* 123:1090–1102.
- 756 Morel P, Ulbrich P, Gail A (2017) What makes a reach movement effortful? Physical effort  
757 discounting supports common minimization principles in decision making and motor  
758 control Rushworth M, ed. *PLoS Biol* 15:e2001323.
- 759 Murphy PR, Boonstra E, Nieuwenhuis S (2016) Global gain modulation generates time-dependent  
760 urgency during perceptual choice in humans. *Nat Commun* 7:13526.
- 761 Myerson J, Green L (1995) Discounting of delayed rewards: models of individual choice. *Journal*  
762 *of the Experimental Analysis of Behavior*:263–276.

## Impact of a demanding movement on decision-making

- 763 Neumann J von, Morgenstern O (1944) *Theory of Games and Economic Behavior*, Princeton  
764 University Press.
- 765 Reppert TR, Rigas I, Herzfeld DJ, Sedaghat-Nejad E, Komogortsev O, Shadmehr R (2018)  
766 Movement vigor as a traitlike attribute of individuality. *Journal of Neurophysiology*  
767 120:741–757.
- 768 Revol P, Collette S, Boulot Z, Foncelle A, Niki C, Thura D, Imai A, Jacquin-Courtois S, Cabanac  
769 M, Osiurak F, Rossetti Y (2019) Thirst for Intention? Grasping a Glass Is a Thirst-  
770 Controlled Action. *Front Psychol* 10:1248.
- 771 Rueda-Orozco PE, Robbe D (2015) The striatum multiplexes contextual and kinematic information  
772 to constrain motor habits execution. *Nat Neurosci* 18:453–460.
- 773 Shadmehr R, Huang HJ, Ahmed AA (2016) A Representation of Effort in Decision-Making and  
774 Motor Control. *Current Biology* 26:1929–1934.
- 775 Shadmehr R, Orban de Xivry JJ, Xu-Wilson M, Shih T-Y (2010) Temporal Discounting of Reward  
776 and the Cost of Time in Motor Control. *Journal of Neuroscience* 30:10507–10516.
- 777 Shadmehr R, Reppert TR, Summerside EM, Yoon T, Ahmed AA (2019) Movement Vigor as a  
778 Reflection of Subjective Economic Utility. *Trends in Neurosciences* 42:323–336.
- 779 Standage D, You H, Wang D-H, Dorris MC (2011) Gain Modulation by an Urgency Signal  
780 Controls the Speed–Accuracy Trade-Off in a Network Model of a Cortical Decision Circuit.  
781 *Front Comput Neurosci* 5 Available at:  
782 <http://journal.frontiersin.org/article/10.3389/fncom.2011.00007/abstract> [Accessed  
783 September 9, 2019].
- 784 Steinemann NA, O’Connell RG, Kelly SP (2018) Decisions are expedited through multiple neural  
785 adjustments spanning the sensorimotor hierarchy. *Nat Commun* 9:3627.
- 786 Summerside EM, Shadmehr R, Ahmed AA (2018) Vigor of reaching movements: reward discounts  
787 the cost of effort. *Journal of Neurophysiology* 119:2347–2357.
- 788 Thura D (2020) Decision urgency invigorates movement in humans. *Behavioural Brain Research*  
789 382:112477.
- 790 Thura D, Beauregard-Racine J, Fradet C-W, Cisek P (2012) Decision making by urgency gating:  
791 theory and experimental support. *Journal of Neurophysiology* 108:2912–2930.
- 792 Thura D, Cisek P (2014) Deliberation and Commitment in the Premotor and Primary Motor Cortex  
793 during Dynamic Decision Making. *Neuron* 81:1401–1416.
- 794 Thura D, Cisek P (2016) Modulation of Premotor and Primary Motor Cortical Activity during  
795 Volitional Adjustments of Speed-Accuracy Trade-Offs. *Journal of Neuroscience* 36:938–  
796 956.

## Impact of a demanding movement on decision-making

- 797 Thura D, Cisek P (2017) The Basal Ganglia Do Not Select Reach Targets but Control the Urgency  
798 of Commitment. *Neuron* 95:1160-1170.e5.
- 799 Thura D, Cos I, Trung J, Cisek P (2014) Context-Dependent Urgency Influences Speed–Accuracy  
800 Trade-Offs in Decision-Making and Movement Execution. *The Journal of Neuroscience*  
801 34:16442–16454.
- 802 Todorov E, Jordan MI (2002) Optimal feedback control as a theory of motor coordination. *Nat*  
803 *Neurosci* 5:1226–1235.
- 804 Turner RS, Desmurget M (2010) Basal ganglia contributions to motor control: a vigorous tutor.  
805 *Current Opinion in Neurobiology* 20:704–716.
- 806 Wickens CD (2002) Multiple resources and performance prediction. *Theoretical Issues in*  
807 *Ergonomics Science* 3:159–177.
- 808 Wickler SJ, Hoyt DF, Cogger EA, Hirschbein MH (2000) Preferred speed and cost of transport.  
809 *Journal of Experimental Biology*:2195–2200.
- 810 Yoon T, Geary RB, Ahmed AA, Shadmehr R (2018) Control of movement vigor and decision  
811 making during foraging. *Proc Natl Acad Sci USA* 115:E10476–E10485.
- 812 Yttri EA, Dudman JT (2018) A Proposed Circuit Computation in Basal Ganglia: History-  
813 Dependent Gain: Proposed Circuit Computation in Basal Ganglia. *Mov Disord* 33:704–  
814 716.

**A**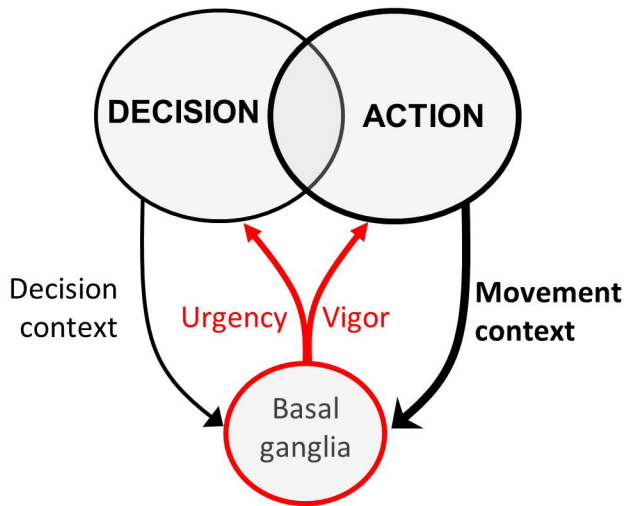**B**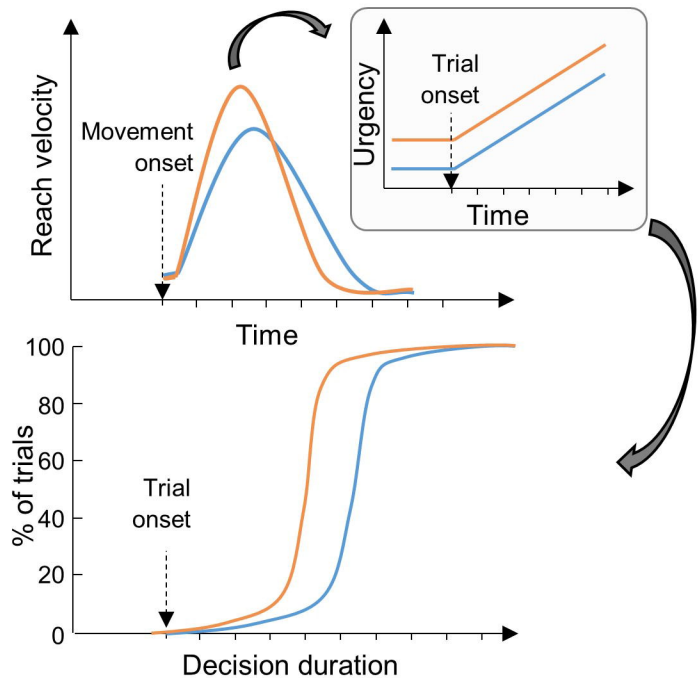

**A**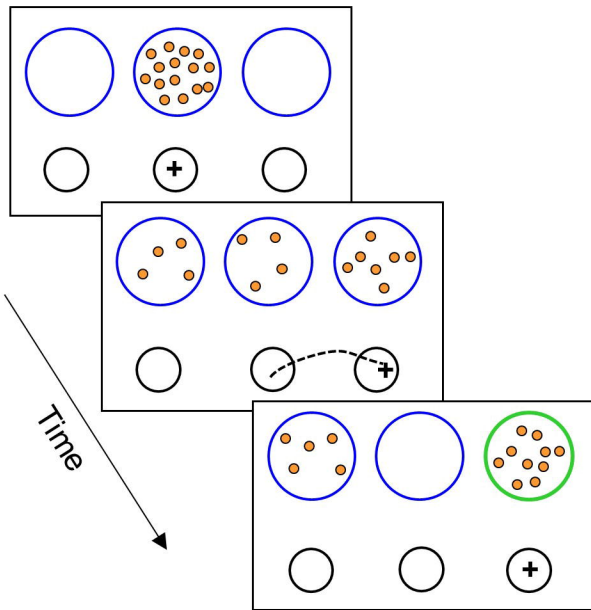**B****4 motor blocks:**

- Small & short targets
- Big & short targets
- ⋯ Small & long targets
- ⋯ Big & long targets

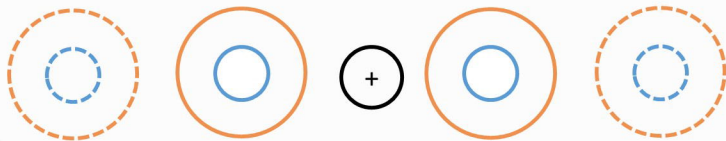**C**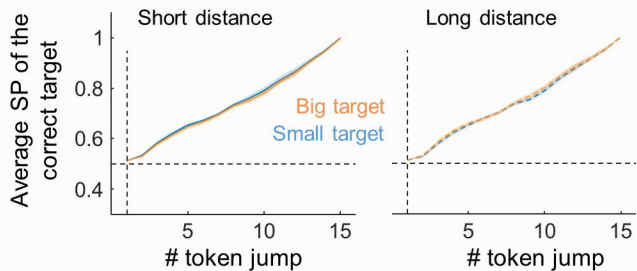



**A****Subject S6**

— Small-short block    - - - Small-long block    — Big-short block    - - - Big-long block

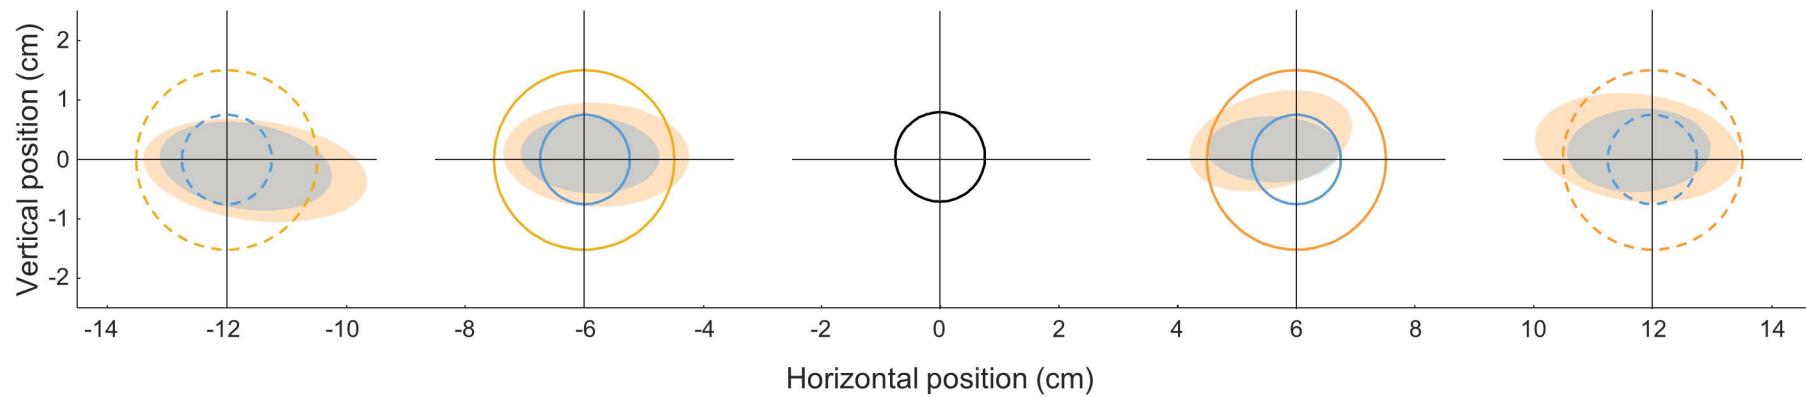**B****Subject S6**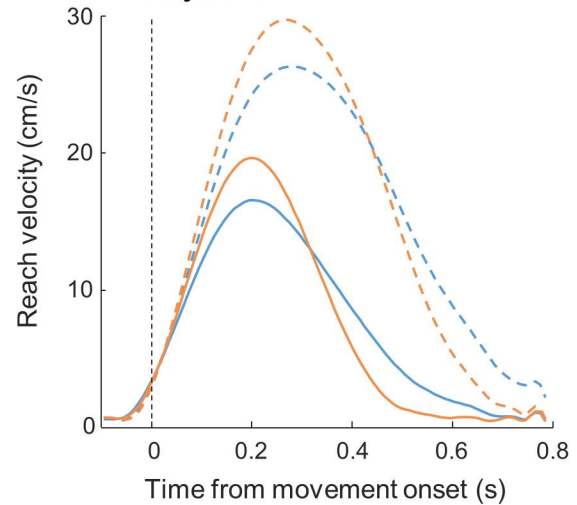

# Tokens task

## A Size contrast

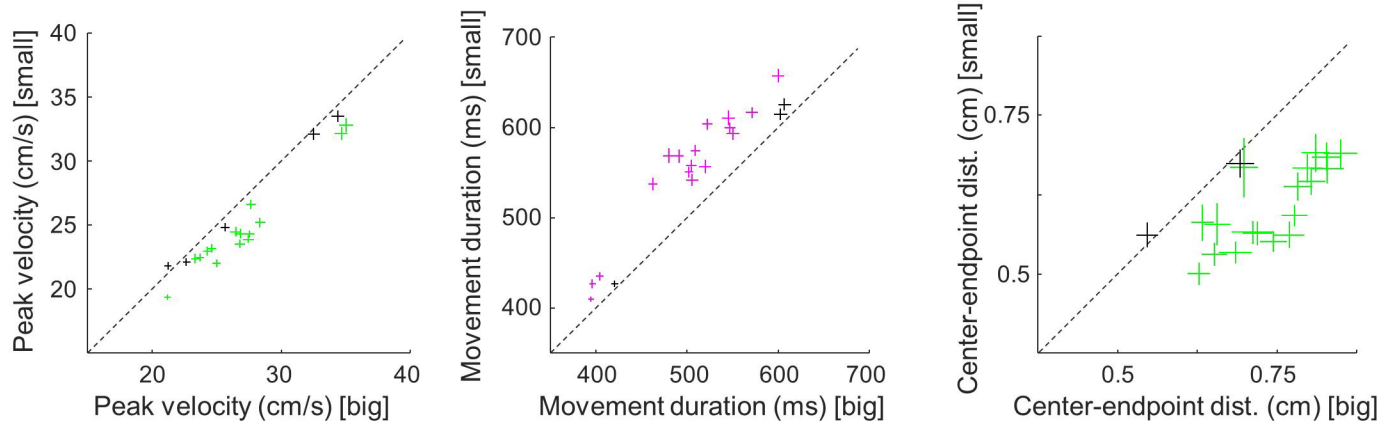

## B Distance contrast

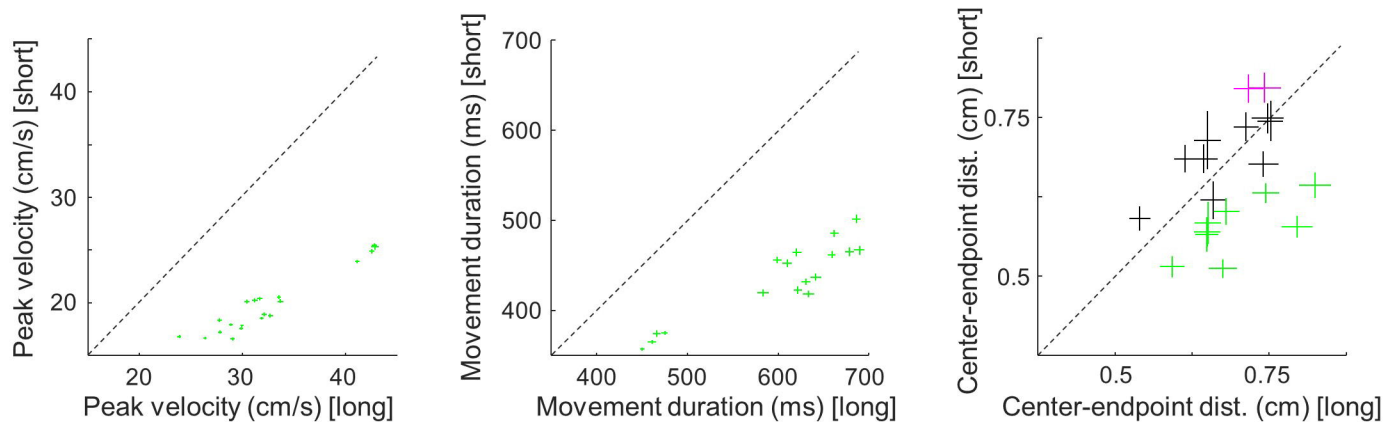

## Tokens task

### A Size contrast

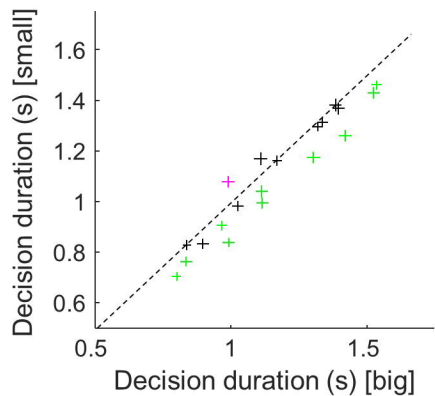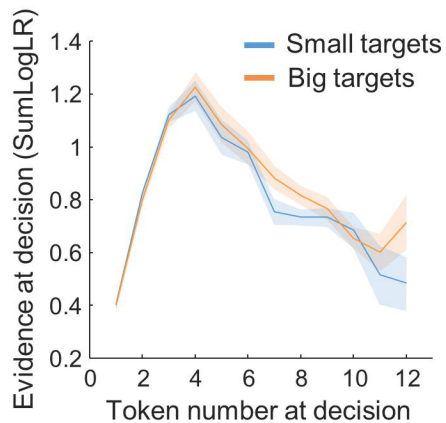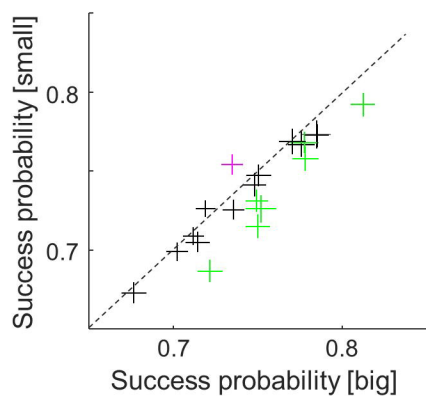

### B Distance contrast

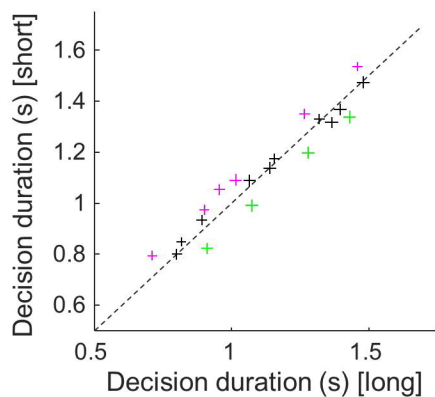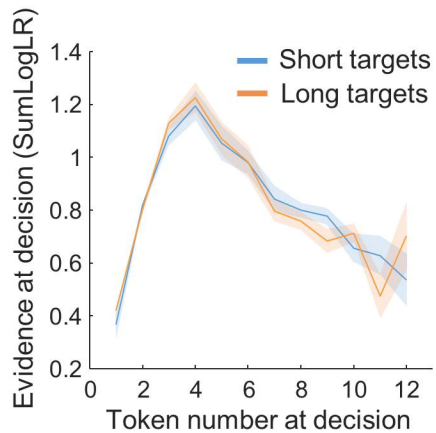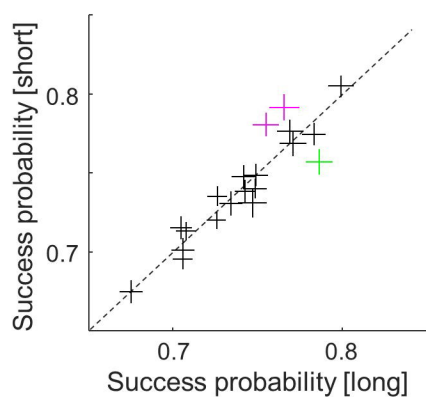

## DR task

### C Size contrast

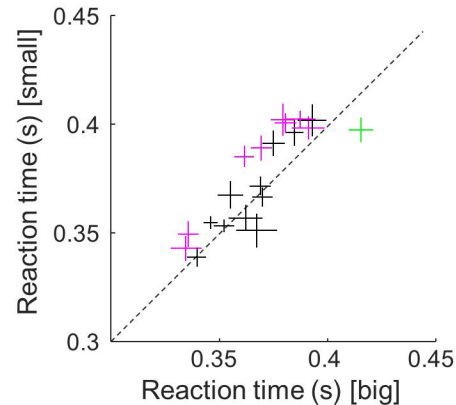

### D Distance contrast

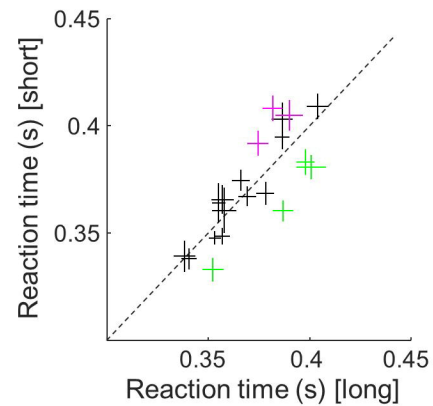

### Size contrast

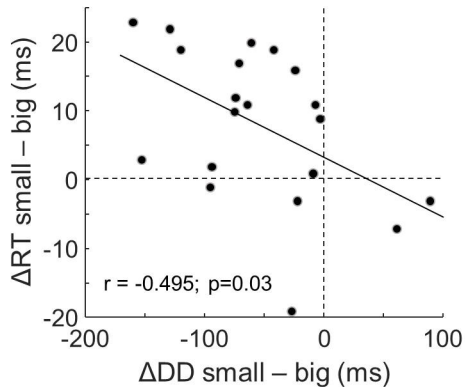

### Distance contrast

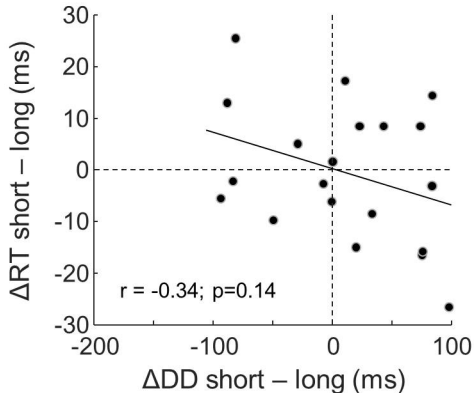

**A Slow block**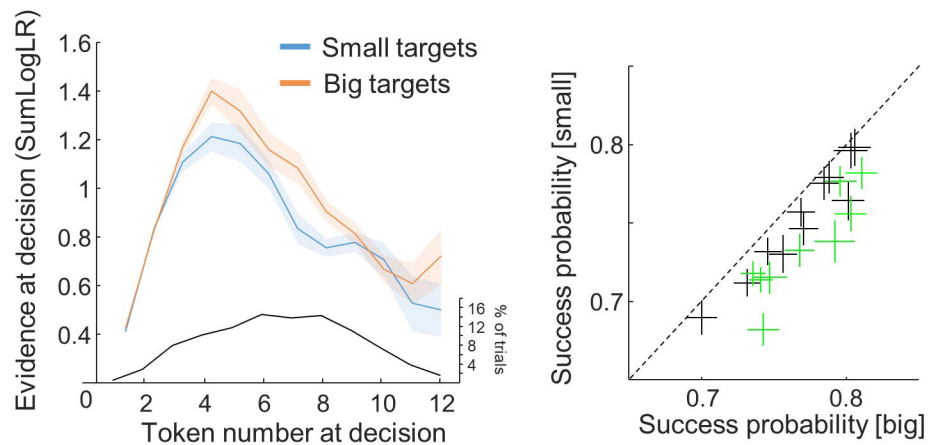**B Fast block**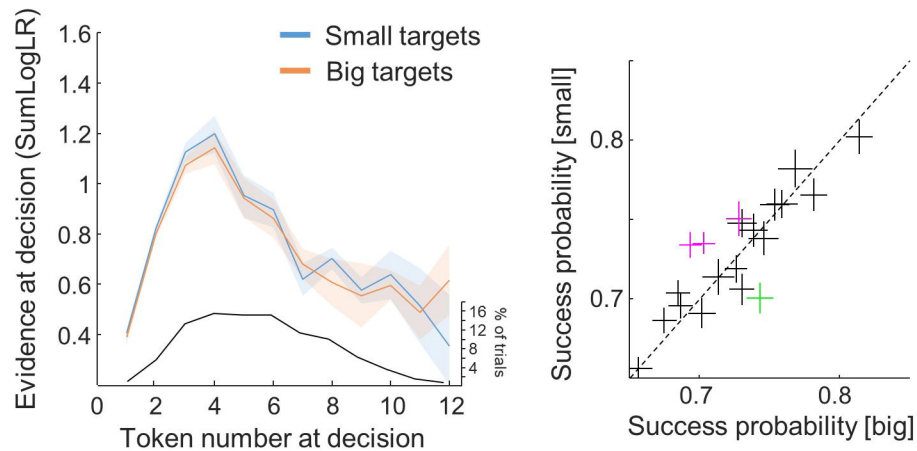**C Session #1**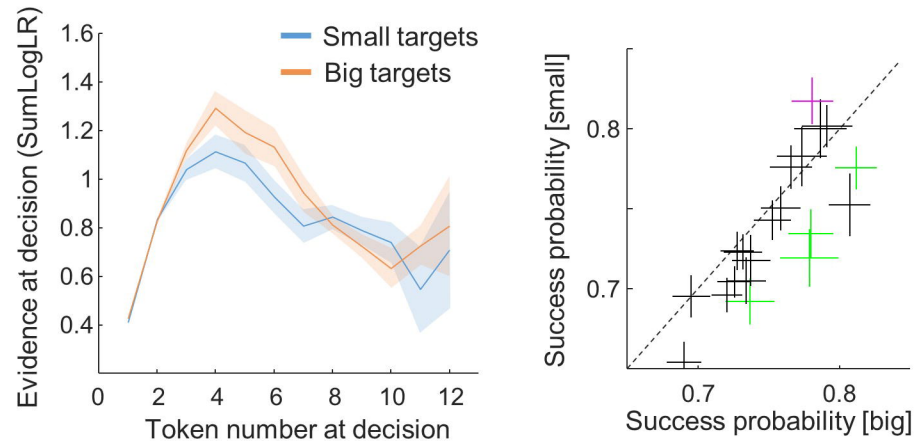**D Session #2**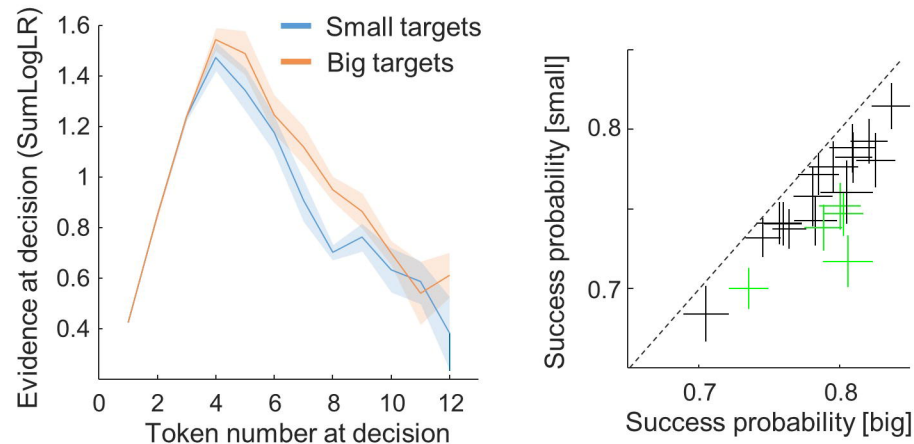

**Slow block**

**Fast block**

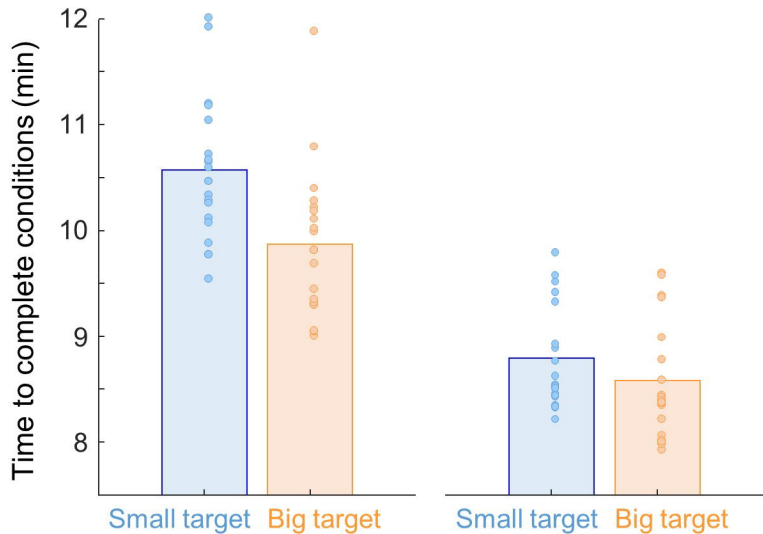

Source: http://biorxiv.org/content/10.1101/2020.04.08.028936v1.full.pdf
